# Supplementary material for: COVID-19 in Solid Organ Transplantation: Results of the National COVID Cohort Collaborative
Source: PubMed Central journal article supplement (PMC8500600; doi:10.1097/txd.0000000000001234), 2021-10-06
Supplement: txd-7-e775-s001.pdf [file txd-7-e775-s001.pdf]

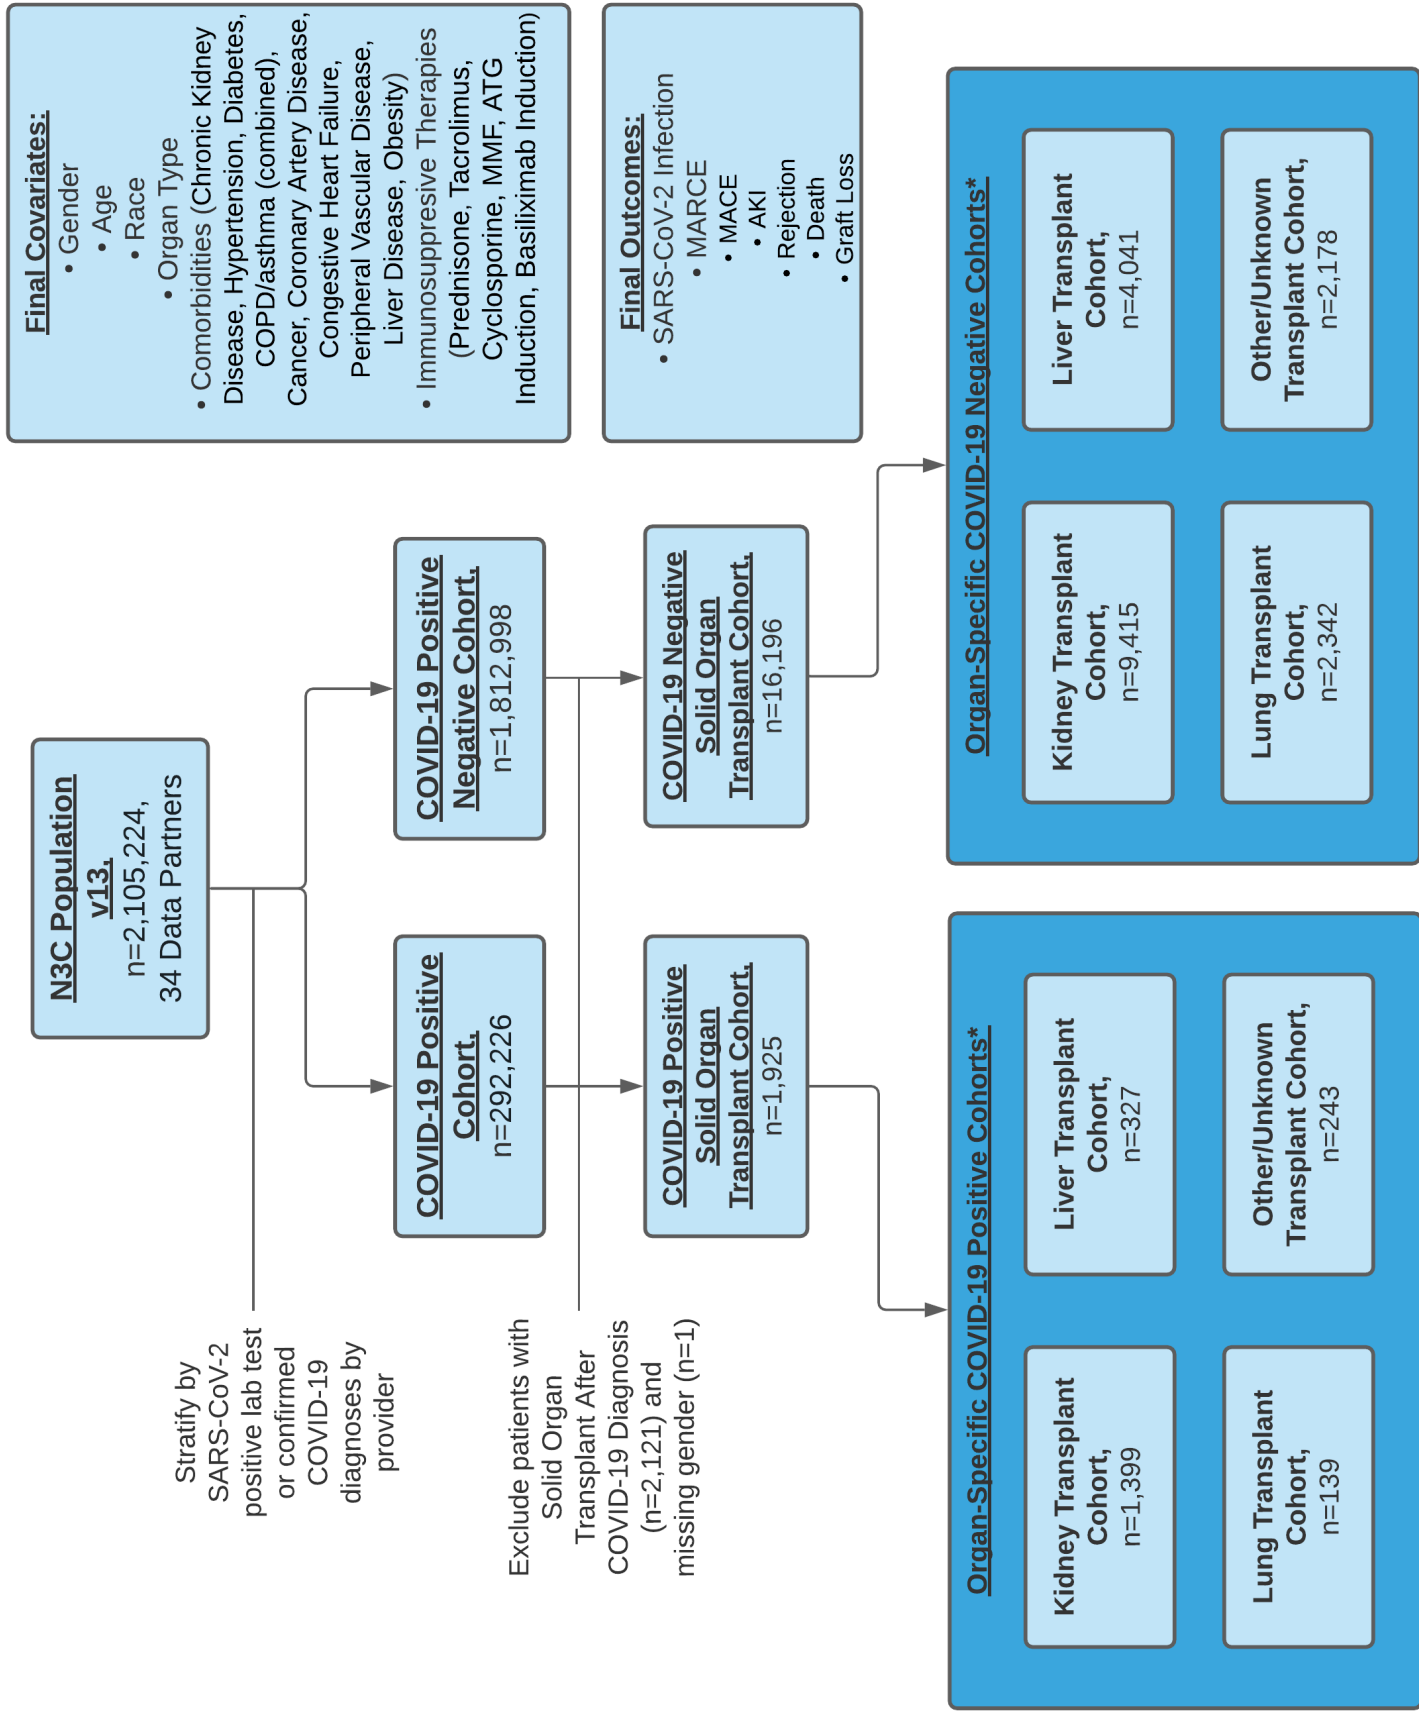

**Final Covariates:**

- Gender
- Age
- Race
- Organ Type
- Comorbidities (Chronic Kidney Disease, Hypertension, Diabetes, COPD/asthma (combined), Cancer, Coronary Artery Disease, Congestive Heart Failure, Peripheral Vascular Disease, Liver Disease, Obesity)
- Immunosuppressive Therapies (Prednisone, Tacrolimus, Cyclosporine, MMF, ATG Induction, Basiliximab Induction)

**Final Outcomes:**

- SARS-CoV-2 Infection
- MARCE
- MACE
- AKI
- Rejection
- Death
- Graft Loss

\*Concept Set definitions for organ-specific cohorts available here:  
[https://github.com/National-COVID-Cohort-Collaborative/CS-ISC/blob/main/MARCE/sot\\_transplant\\_concept.xlsx](https://github.com/National-COVID-Cohort-Collaborative/CS-ISC/blob/main/MARCE/sot_transplant_concept.xlsx)
